# Supplementary material for: Amplification-free long-read sequencing of TCF4 expanded trinucleotide repeats in Fuchs Endothelial Corneal Dystrophy
Source: PubMed Central journal article supplement (PMC6611681; doi:10.1371/journal.pone.0219446), 2019-07-05
Supplement: pone.0219446.s001.pdf [file pone.0219446.s001.pdf]

## Supplementary Figure 1

A

- **crTCF4-1** = sgRNA: TGTCTGCGGATCTGTAGTGG (w/2.9 kb MfeI)
- **crTCF4-2** = sgRNA: GGGACCGAGGACTTTGCCAG (w/2.6 kb MfeI)
- **crTCF4-3** = sgRNA: AGCTACTTTGAAAAGCGGAG (w/2.4 kb MfeI)
- **crTCF4-4** = sgRNA: GCGAGTGTGAGTGTGCGAGG (w/2.3 kb MfeI)
- **crTCF4-5** = sgRNA: TAAATGATGCGCTGAAGAG (w/2.2 kb MfeI)

CAATTG GATACCTTTAGATCCCAAACCTTCATCCTATCATTGGTTTCTGGATAGATTATTTATTGCCCTTG  
AAATTCAGCAGAAGGGGGCTGGGTGCAGTGGCTCACACCTGTAATTCCAGTACTTTGGGAGGCCGAGGTG  
GGCAGACCACCTGAGGTCAGGGGTTTGAGACCACCCTGATGAACATGGAGAAATCCCATCTCTACTAAAA  
ATACAAAATTAGCCGAGTGGGGTGACGCATGCCTGTAATCCCAGCTACTTTGGGAGGCTGAGGCAGGAGAA  
TCGCTTGAACCTGGGAGGTGGAGGTTGCAGTGCAGCAAGATCGTGCCATTGCACTCCAGCCTGGGCAACA  
AGAGTGAACTCCATCTCAAAACAAAACAAAACAAAACAAAACAAAACAAAACAAAACAAAACAAAACAAA  
CTTAAAAACCTAAAAGCTAGAAGGGGTTTTATTGGATTATCTAATCTAACCTCTGGATTTTACAGCAAAA  
GACATTGACATTGGGCCTTAGTTCAAAGAATGACTAGAGGTAGAGCCAGTGGAAATTTCTCCTAACCCAAC  
GTTTGTGATCTTTTCATTACATCATCTAAGCAGAACCTGTAGGGGTTAACTCTGAGAATTGGGGATGATG  
CTTGTGATAATGCAGCAAAAAGTAATGTCTAAATGTAAGATATTATTTTGAGATGAGAACCCGAATGGG  
GATGGAAGACAGGAATCTTCACCATGTGTGAATGTACAGGAAACAACCAATAAATGCCTTAATTCTTGTT  
CTGTAAAACTTACATGTAAGTAAAAGATCGCCGAAATTGATCTGAACTCTGTTACTGCCACAAAACTTTT  
ATCAGCAAATGGAGATTAGGATGTTCCCACTGCCAGATGGTATATAGGAATATGGTTGAATGTGGACTGT  
TATCACAGACTGTCTGGTTTTCAAAGTGGGCTCTGTCACTCAATATAGTTGTGTGACTTAGTTAAGTTTG  
TACCACTTACAAAACCTTCTTCCTTGGGTCAAGCTACTCAATTTTACTTGCTTCTGTTGCCCAATATACAA  
ATTACAGTAGTAATACATACTCCATAGGGTTATTCTTAGGCTTAAAGTAGCCAGTATTTGTGAAGTTATA  
GGAACACTGTTTAGCATATAGTAAACACATGTGTTATCTGTCAATTATTACTTGCTTTTCTGTTGCAA  
AGACTAAAAGCTATTGTTTTGGAGTAGGGAAATTTCCATTTAAAATTTCCATTGGCTAGGTTAGCGGTATC  
AGTTGATTTAGCAAGGAATTAAGAGATGAAAAGGAATTTTCTTTCTGTTGGTGGCTTCATCTTTATCTGT  
ATCCACTATAAAAATTCGTAAAGTGGGCTTATTTGCTTTACACAGACCAGAAAACAGGCTACAGAAGGTA  
ACTGCTTGGCCAGAAATGGGTTGAGTCAGTCGTGGCTTATGGCACAACTACATTTGAGTCTACAAAGCA  
ATAGATGAAGGTCTTCGCCAAGTGAAGACTTTTTGGACTTGGAAAAGTTCACACACTTCCAGCGCTCTATA  
AGAAGATAGGGTGGGGGAGTTGGAGGAGAGGACCCACATCCCTCTTCCAGCCTAGGACCAACTTGGCCCA  
GAGGCCTTTTCCCATGCCGCCCAAGGCTCGCTGAGAAATCTGGCTCCACACAGTGGGAGAACCAGGGTC  
AGGCTTACTGTGAGTGAGGCCGGCCAGTCTTTCCGAGCCTTCTCAGGGAGACCTGGGGGTATCTCAC  
TTCCCTGCGGAAGTCTGTGGAGTTTAATTTGTAATTTGTGCCGAACTACACTTTTGTGTCAAAGAGCA  
AGGACGGCCAAGAAGCGGCAACACGAATAAGAGCGCAGGGAAATGGGGCCTGCGAACGACCTCGGCCTCG  
GGAACCTCCACAGTGCCGCCCCACGCGGACGCTACCCGAGAACAGCCACCCGCTCCGCTCCCGGAGG  
AGGCGTGGTCGACCAGCACCCGCATCTTGGCCGCTCTCTAGGCGCTCTGTTTACCCTCTATGGTCGCC  
TGCTCCCGCCCCGCCCCCTTCCCAGTCATTGTCTGGAGGAGCAGCCGCGGCCGAGCTCCTTCTCTTTATA  
AGCCCGCAGTTCCCGGATGTGAATGGATTACAATGTATCTTTTACAGGAAACCTATTATTATCAATGTGAC  
TCCACGGGGGAGTCCATGGTGATGATGATGAGGAGGAGGATGATGATGATGAGACACCTCTAAACTTGG  
ACAAGTTTAAAGACTTTATGAGAGAAGAAAAAATCACCAACAAGAATTGTTTGAGGAAAAATTATAACT  
ATCCTGTGTTTCAATTTTTTTTTTATAAACAATAAGAAAAAGTTGTTGGATTTTTTTTTTAAATGATTTCTTT  
TTTGGGGGAGGGAATTTTGTGAGTTTTATGGTGGAAAATGCAAAAACCAGAGCCAGGTGCATAATCTT  
GTAATCTGTGGATATCCCTGGAGCAGGACTGAGTACCAGTTAAAATACTTTTTGGGGATACACATGTGAG  
ATACTAAGTACTTGCAGAAGATTTTTGTCTCTCTTTTTAAAGTCTCTTTCCTTGGAAATATTGTGAGAATA  
TTTGTGGCCATTTAAGGTAACGTTTCAATTTGCCGTCAGAGTAAACTGTTTGTAAATTGAATTTAATTTTT  
AAAATGTCGATCCCGATGTTTTATTAAACAAAAGGGACAACCTATTAATAAATTGCCAATGGGAAAAAG
