# Supplementary material for: Amplification-free long-read sequencing of TCF4 expanded trinucleotide repeats in Fuchs Endothelial Corneal Dystrophy
Source: PubMed Central journal article supplement (PMC6611681; doi:10.1371/journal.pone.0219446), 2019-07-05
Supplement: pone.0219446.s002.pdf [file pone.0219446.s002.pdf]

# Supplementary Figure 2

001 (19, 61)

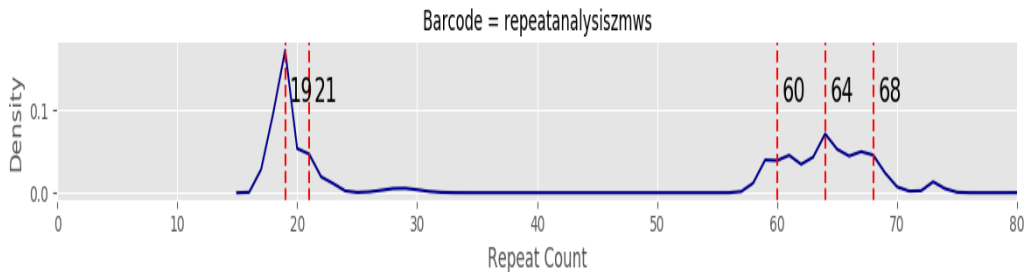

Per-ZMW Repeat Estimates for FUCHS  
Barcode repeatanalysiszmws--repeatanalysiszmws

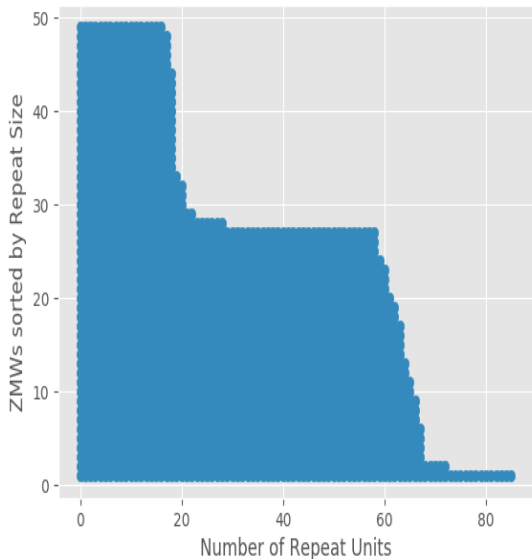

Allele1: 17xAGC, 12xAGG; Allele2: 64xAGC, 13xAGG

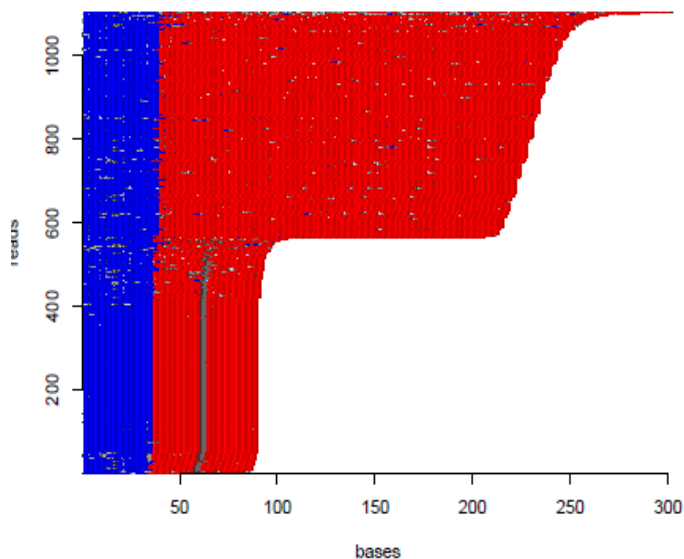

021 (15, 72)

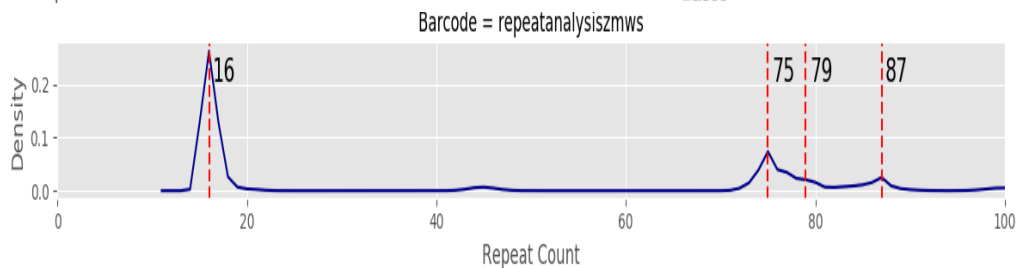

Per-ZMW Repeat Estimates for FUCHS  
Barcode repeatanalysiszmws--repeatanalysiszmws

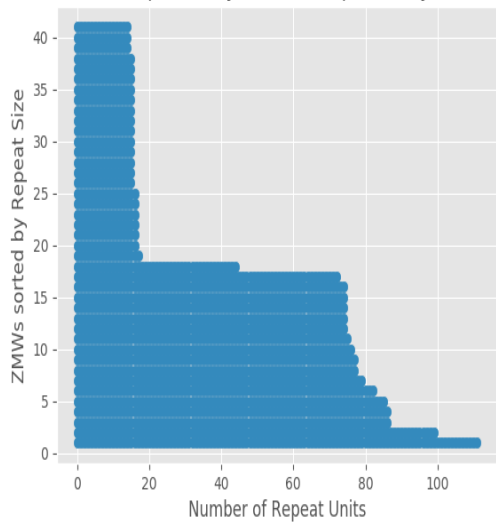

Allele1: 15xAGC, 12xAGG; Allele2: 15xAGC, 12xAGG

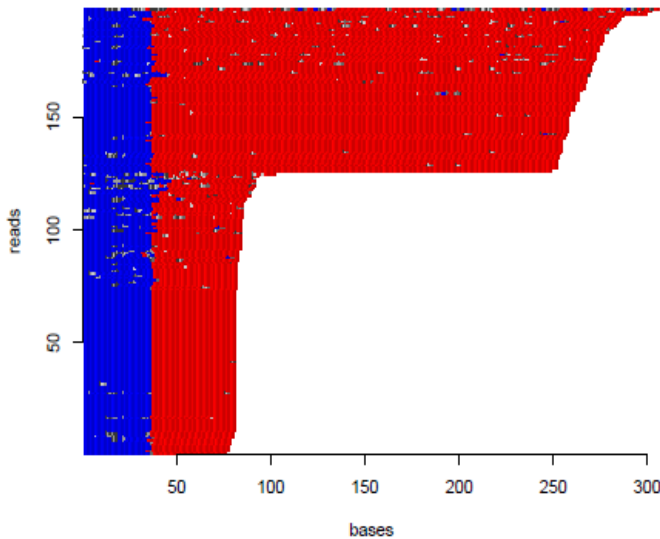

023 (16, 74)

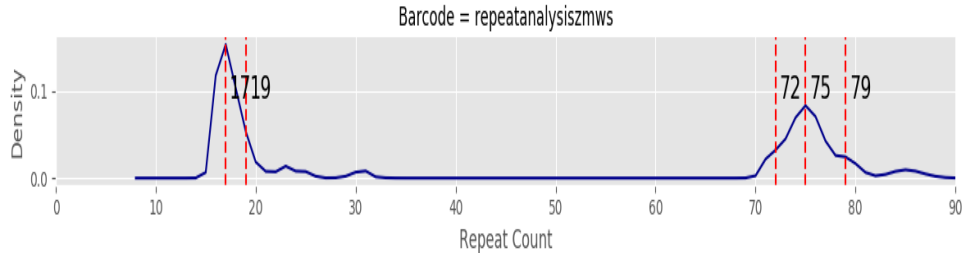

Allele1: 16xAGC, 12xAGG; Allele2: 74xAGC, 13xAGG

Per-ZMW Repeat Estimates for FUCHS  
Barcode repeatanalysiszmws--repeatanalysiszmws

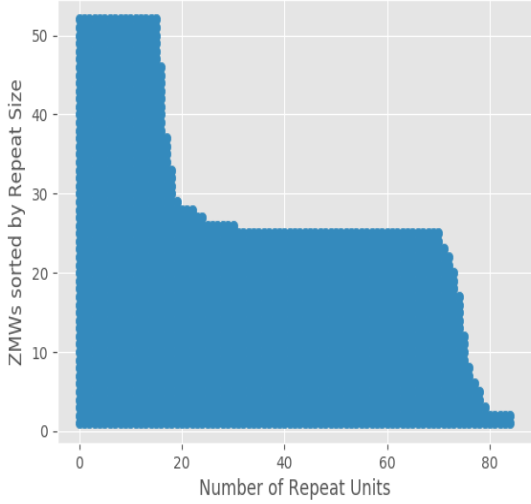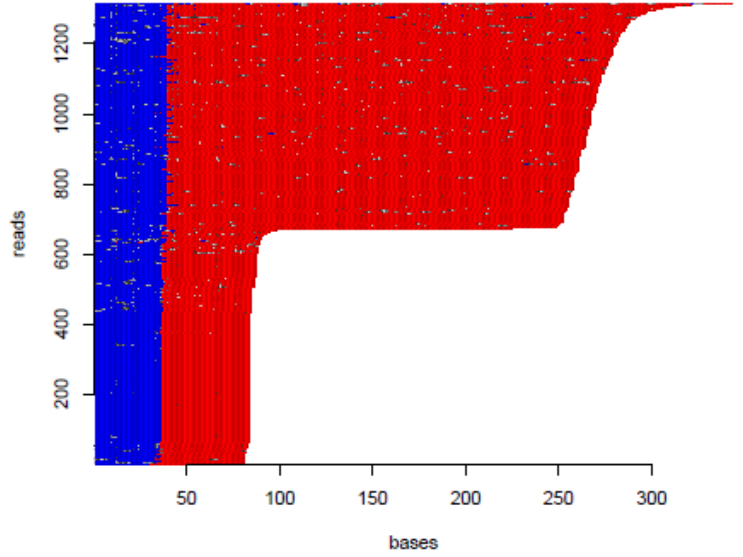

016 (24, 77)

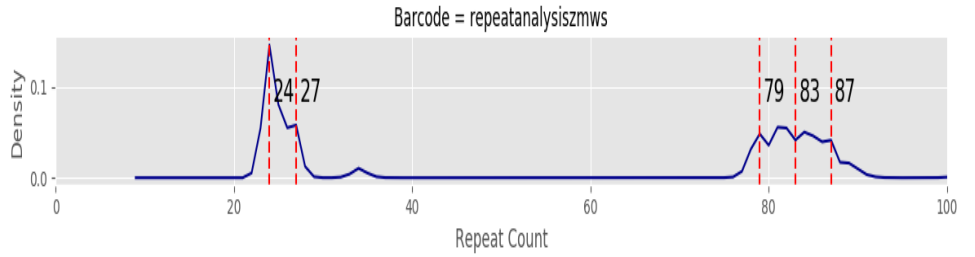

Allele1: 23xAGC, 12xAGG; Allele2: 85xAGC, 12xAGG

Per-ZMW Repeat Estimates for FUCHS  
Barcode repeatanalysiszmws--repeatanalysiszmws

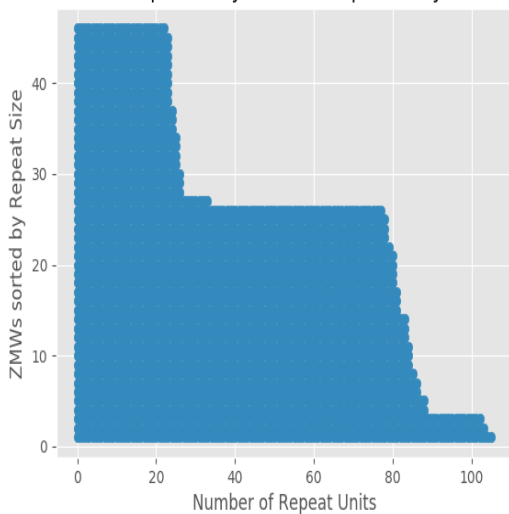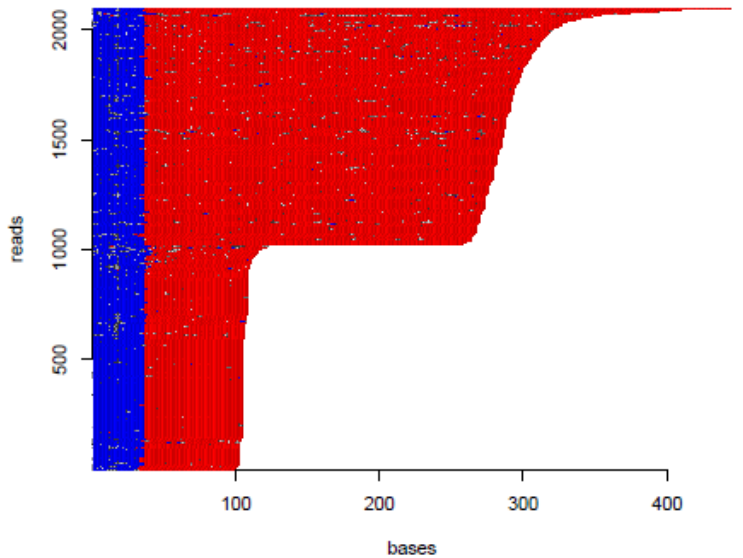

018 (19, 88)

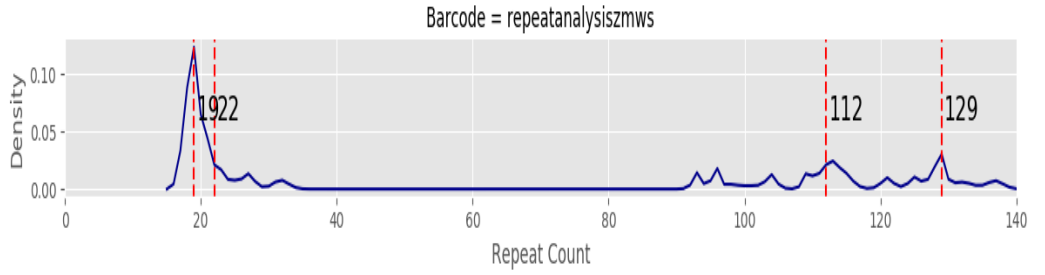

Per-ZMW Repeat Estimates for FUCHS  
Barcode repeatanalysiszmws--repeatanalysiszmws

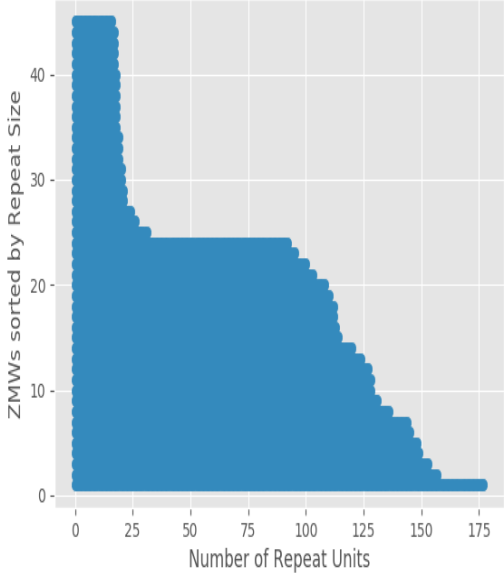

Allele1: 17xAGC, 12xAGG; Allele2: 18xAGC, 12xAGG

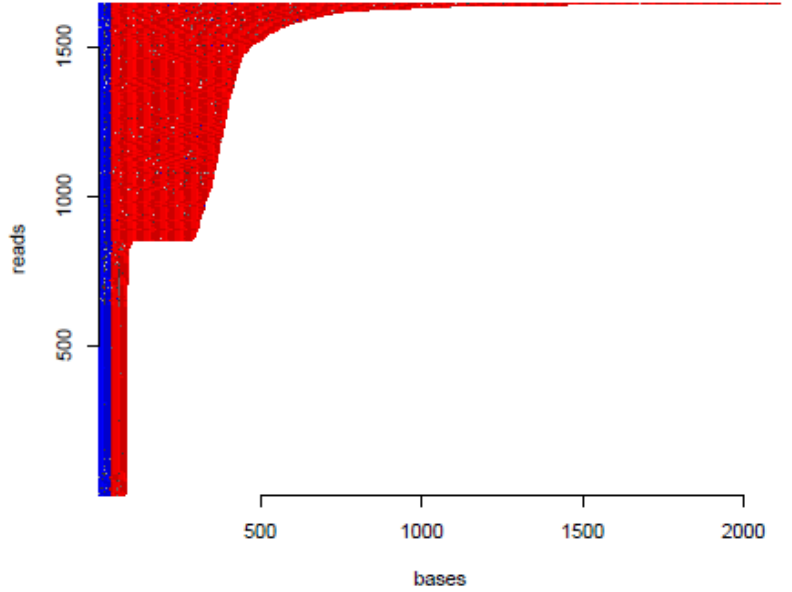

4938 (26, 89)

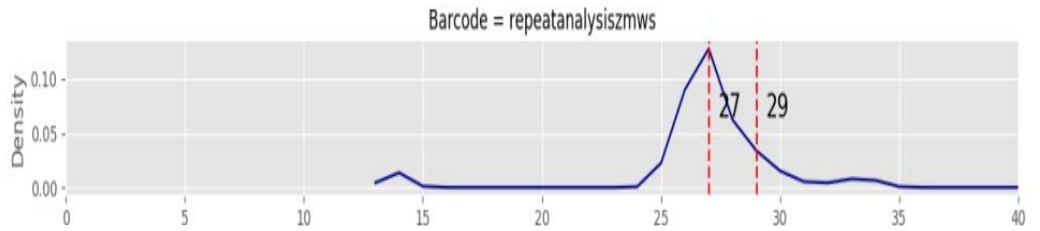

Per-ZMW Repeat Estimates for FUCHS  
Barcode repeatanalysiszmws--repeatanalysiszmws

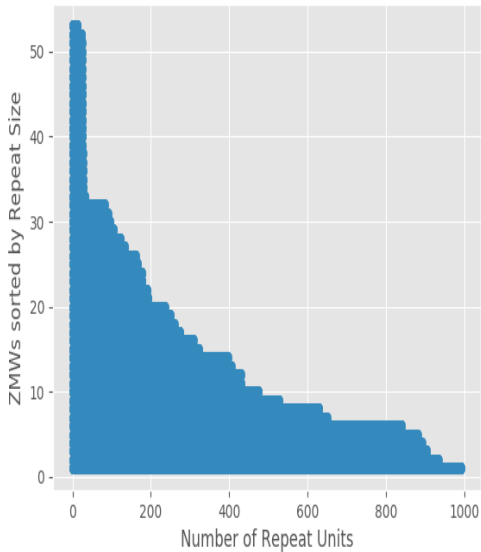

Allele1: 26xAGC, 12xAGG; Allele2: 27xAGC, 11xAGG

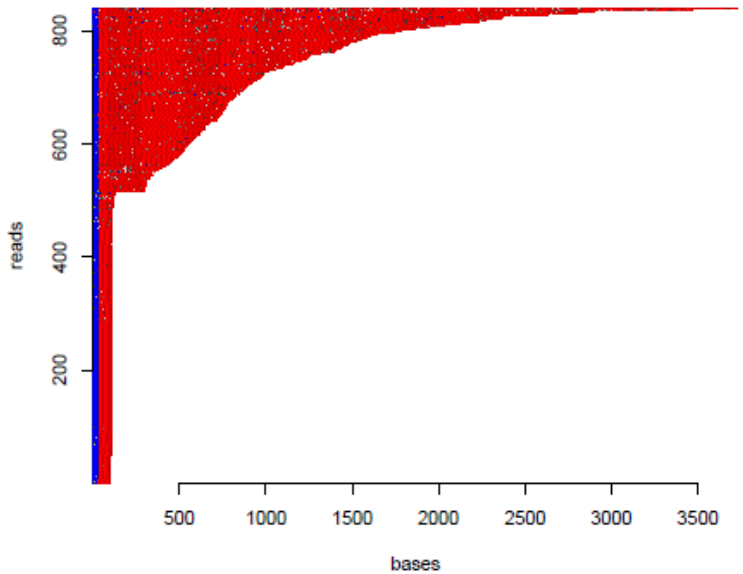

003 (12, 90)

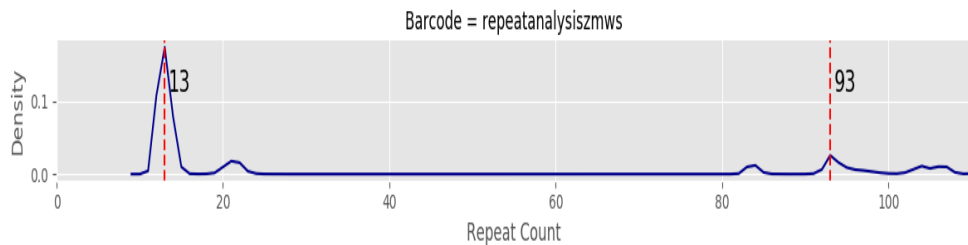

Per-ZMW Repeat Estimates for FUCHS  
Barcode repeatanalysiszmws--repeatanalysiszmws

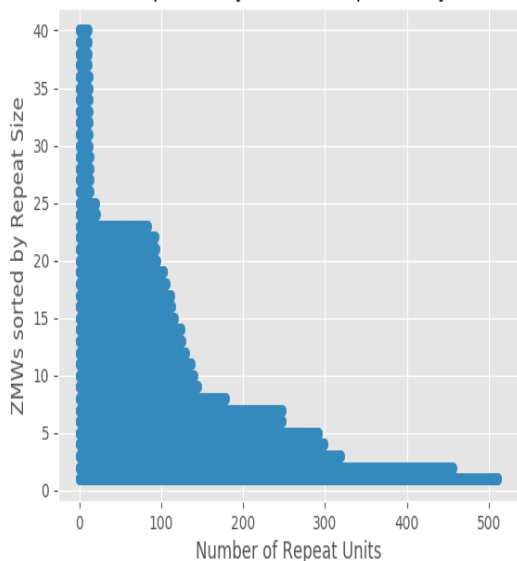

Allele1: 12xAGC, 12xAGG; Allele2: 13xAGC, 12xAGG

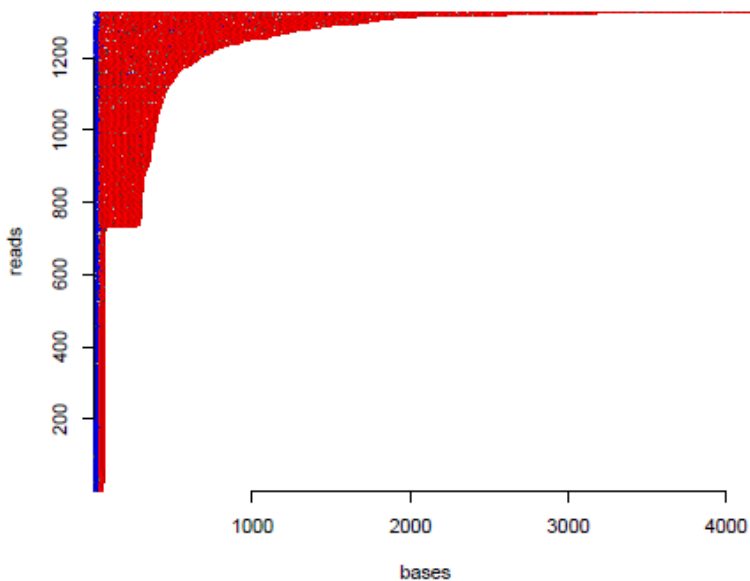

4823 (12, 112)

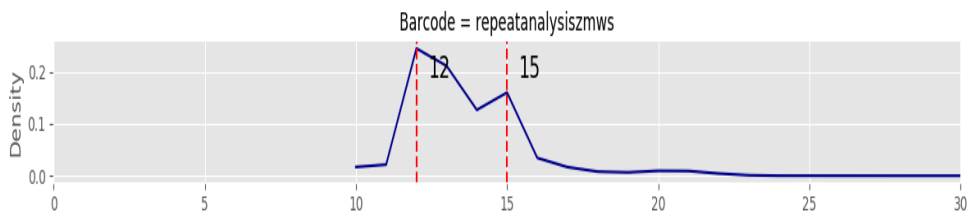

Per-ZMW Repeat Estimates for FUCHS  
Barcode repeatanalysiszmws--repeatanalysiszmws

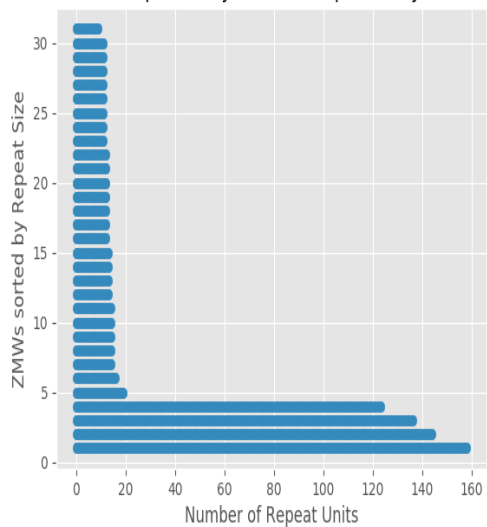

Allele1: 12xAGC, 12xAGG; Allele2: 12xAGC, 12xAGG

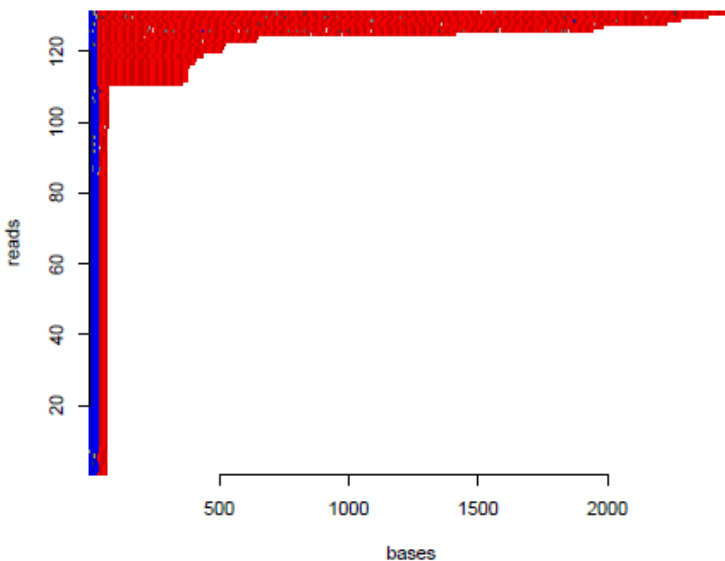

603 (12,15)

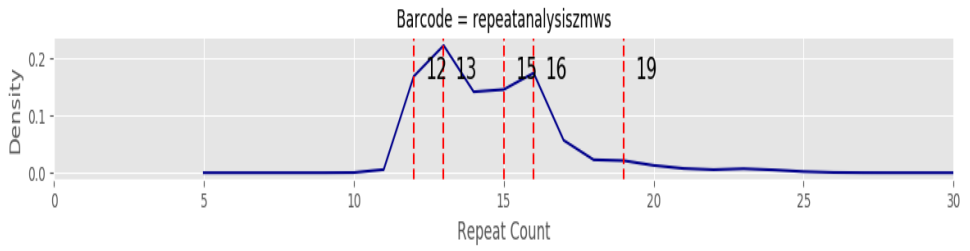

Per-ZMW Repeat Estimates for FUCHS  
Barcode repeatanalysiszms--repeatanalysiszms

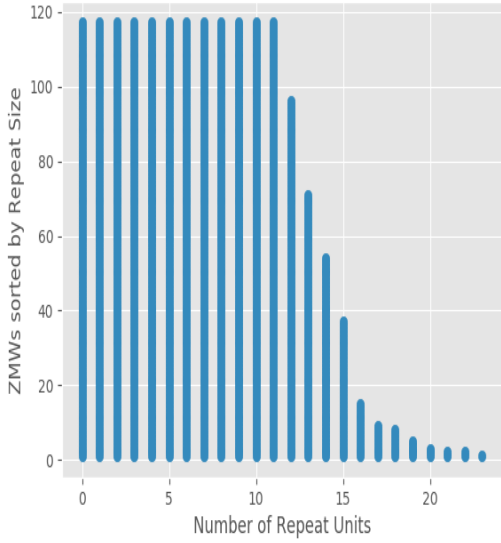

Allele1: 12xAGC, 12xAGG; Allele2: 15xAGC, 12xAGG

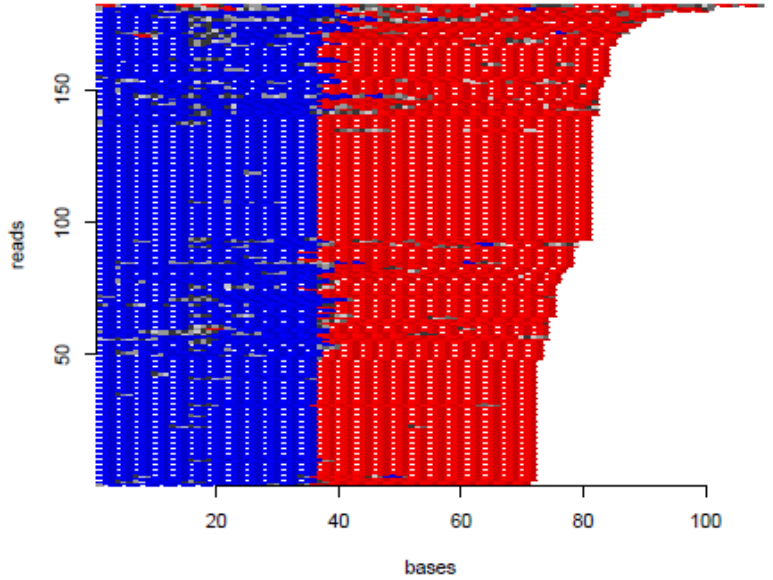

026 (12, 16)

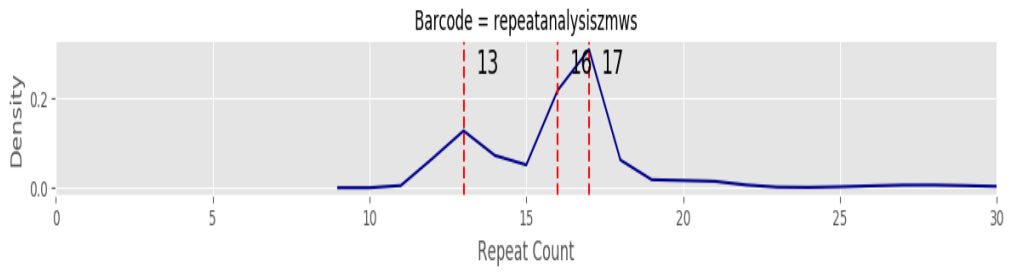

Per-ZMW Repeat Estimates for FUCHS  
Barcode repeatanalysiszmws--repeatanalysiszmws

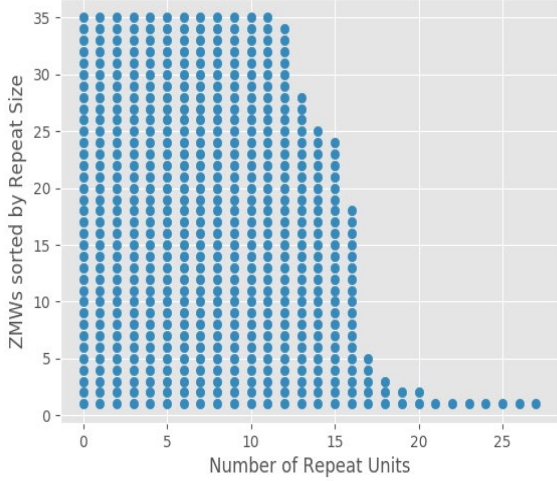

Allele1: 12xAGC, 12xAGG; Allele2: 16xAGC, 12xAGG

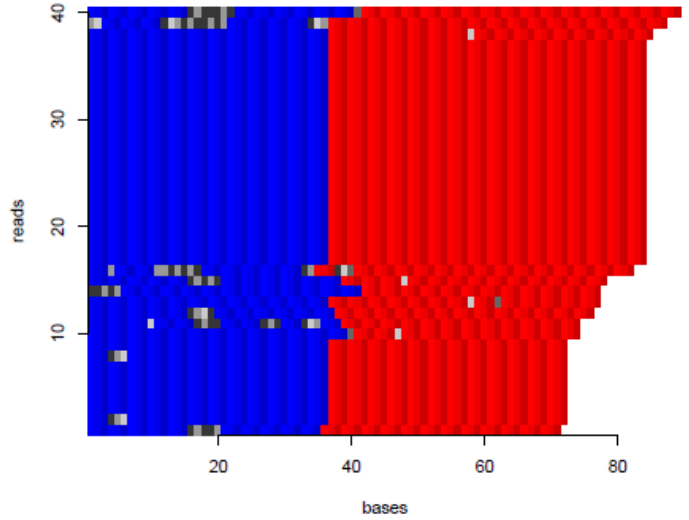

598 (12, 16)

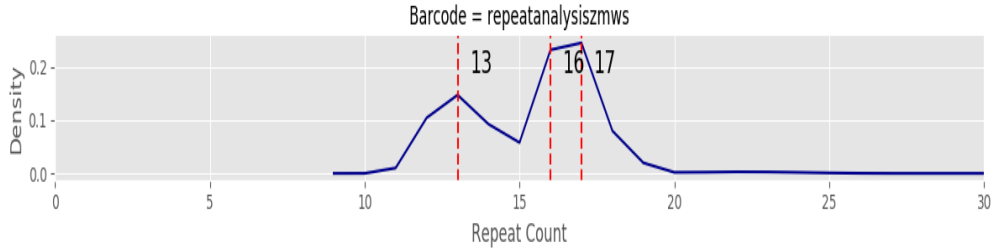

Per-ZMW Repeat Estimates for FUCHS  
Barcode repeatanalysiszmws--repeatanalysiszmw

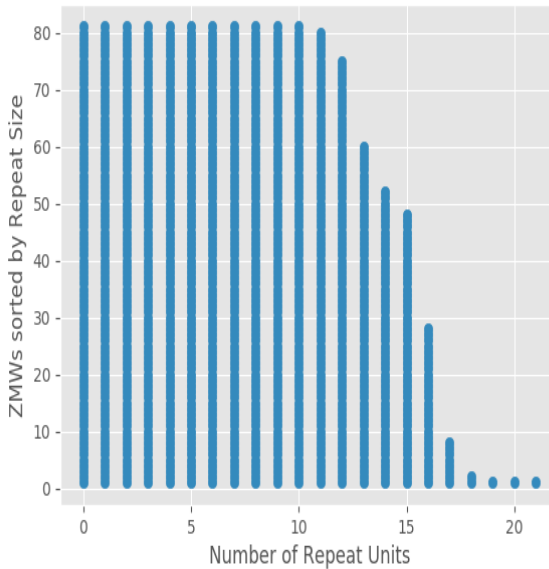

Allele1: 12xAGC, 12xAGG; Allele2: 16xAGC, 12xAGG

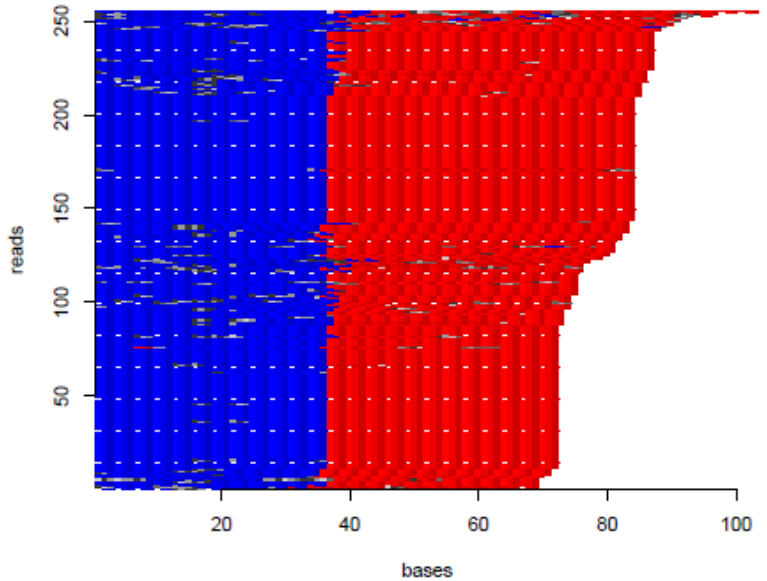

**Supplementary Fig. 2. Assessment of repeat length by long-read SMRT sequencing for additional samples.** The repeat count histograms, ZMW vs repeat length plots and HTT repeat analysis plots are provided for each sample in this study as described in the legend to Fig. 1. In each case, the STR results for that sample are given in parentheses immediately after the sample name.
